# Supplementary material for: Artificial Intelligence in Decision Support Systems for Type 1 Diabetes
Source: Sensors (Basel). 2020 Jun 5;20(11):3214. doi: 10.3390/s20113214 (PMC7308977; doi:10.3390/s20113214)
Supplement: Supplementary file 1 [file sensors-20-03214-s001.pdf]

## Supplementary

**Table S1.** Summary of decision support strategies evaluated in this review.

| Citation               | Purpose of Decision Support                        | Algorithm                                                                        | Evaluation strategy                       | Study type / Dataset                        | Reported Outcome                          |
|------------------------|----------------------------------------------------|----------------------------------------------------------------------------------|-------------------------------------------|---------------------------------------------|-------------------------------------------|
| Bellazzi et al         | Insulin dose adjustment                            | Case-based reasoning                                                             | Real-world use                            | Clinical Study                              | % HbA1c                                   |
| Schwartz et al         | Insulin dose adjustment<br>Carbohydrate intake     | Case-based reasoning                                                             | Retrospective analysis of real-world data | Data collection<br>Secondary data analysis  | Accuracy of identified cases              |
| Herrero et al          | Insulin dose adjustments                           | Case-based reasoning<br>Run-2-Run                                                | Simulated use                             | <i>In silico</i> clinical study: UVA-Padova | % Time-in-range<br>% time-in-hypoglycemia |
| Reddy et al            | Insulin dose adjustment                            | Case-based reasoning<br>Run-2-Run                                                | Real-world use                            | Clinical Study                              | % Time-in-range<br>% time-in-hypoglycemia |
| Torrent Fontbona et al | Insulin dose adjustment                            | Case-based reasoning<br>Concept drift                                            | Simulated use                             | <i>In silico</i> clinical study: UVA-Padova | % Time-in-range<br>% time-in-hypoglycemia |
| Liu et al              | Hypoglycemia alarm<br>Carbohydrate intake          | Run-2-Run                                                                        | Real-world use                            | Clinical study                              | % Time-in-range<br>% time-in-hypoglycemia |
| Tyler et al            | Insulin dose adjustment                            | K-nearest-neighbors<br>Model-based bolus adjustment<br>Heuristic quality-control | Real-world use                            | Clinical study                              | % Time-in-range<br>% time-in-hypoglycemia |
| Biagi et al.           | Glycemic Pattern Identification                    | K-means clustering                                                               | Retrospective analysis of real-world data | Secondary data analysis                     | Glycemic profiles                         |
| Nimri et al            | Insulin dose adjustment                            | Rule-based fuzzy logic                                                           | Real-world use                            | Clinical study                              | % Time-in-range<br>% time-in-hypoglycemia |
| Pankawska et al        | Insulin dose adjustment<br>Carbohydrate estimation | Voice recognition<br>Rule-based heuristics                                       | Real-world use                            | Clinical study                              | % Time-in-range                           |

|                               |                                                             |                                                                                       |                                           |                                                                     |                                                        |
|-------------------------------|-------------------------------------------------------------|---------------------------------------------------------------------------------------|-------------------------------------------|---------------------------------------------------------------------|--------------------------------------------------------|
| Palerm et al                  | Basal insulin dose adjustment                               | Run-2-Run                                                                             | Simulated use                             | Proof of concept                                                    | Time to convergence                                    |
| Herrero et al                 | Basal insulin dose adjustment                               | Run-2-Run                                                                             | Simulated use                             | <i>In silico</i> clinical study: UVA-Padova                         | % Time-in-range<br>% time-in-hypoglycemia              |
| Toffanin et al                | Basal insulin dose adjustment                               | Run-2-Run                                                                             | Simulated use                             | <i>In silico</i> clinical study: UVA-Padova                         | % Time-in-range<br>% time-in-hypoglycemia              |
| Zisser et al                  | Bolus insulin dose adjustment                               | Run-2-Run                                                                             | Real-world Use                            | Clinical Study                                                      | Mean glucose preceding and following meals             |
| Wong et al                    | Insulin dose adjustment                                     | Model-based simulated replay                                                          | Simulated use                             | <i>In silico</i> clinical study: AIDA simulator                     | % HbA1C<br>% time-in-hypoglycemia                      |
| Rosales et al                 | Insulin bolus dose and shape                                | Constrained optimization                                                              | Simulated use                             | <i>In silico</i> clinical study: UVA-Padova                         | % Time-in-range<br>% time-in-hypoglycemia              |
| Revert et al<br>Rosetti et al | Insulin bolus dose and shape                                | Interval analysis                                                                     | Real-world Use                            | Clinical Study                                                      | Postprandial AUC                                       |
| Breton et al                  | Insulin dose adjustment<br>Exercise hypoglycemia prevention | Kalman-filter state estimation<br>Model-based simulated replay<br>Logistic regression | Real-world use                            | Clinical study                                                      | % Time-in-range<br>% time-in-hypoglycemia              |
| Goodwin et al                 | Insulin bolus dose and shape                                | Model-based forecasting                                                               | Retrospective analysis of real-world data | Data collection<br>Secondary data analysis                          | % of subject data lying within the prediction envelope |
| Sun et al                     | Insulin dose adjustment                                     | Actor-critic reinforcement learning                                                   | Simulated use                             | <i>In silico</i> clinical study: UVA-Padova                         | % Time-in-range<br>% time-in-hypoglycemia              |
| Perez-Gandia et al            | Insulin dose adjustment<br>Carbohydrate intake              | Artificial neural network                                                             | Real-world use                            | Clinical Study                                                      | Kovatchev's risk index                                 |
| Srinivasan et al              | Insulin bolus dose and shape                                | Particle swarm optimization                                                           | Simulated use                             | Proof of concept study, <i>In silico</i> clinical study: UVA-Padova | % Time-in-range<br>% time-in-hypoglycemia              |
| Anthimopoulos et al           | Carbohydrate Estimation                                     | Computer vision                                                                       | Real-world use                            | Proof of concept study                                              | Mean absolute error                                    |

|                                                                     |                                                 |                                                           |                                           |                                             |                                                                         |
|---------------------------------------------------------------------|-------------------------------------------------|-----------------------------------------------------------|-------------------------------------------|---------------------------------------------|-------------------------------------------------------------------------|
| Vasiloglou et al                                                    |                                                 |                                                           |                                           |                                             |                                                                         |
| Mahmoudi et al                                                      | Missed meal detection                           | Kalman-filter state estimation                            | Simulated use                             | <i>In silico</i> clinical study: UVA-Padova | % Time-in-range<br>% time-in-hypoglycemia<br>% Sensitivity              |
| Samadi et al                                                        | Missed meal detection                           | Rule-based fuzzy logic                                    | Retrospective analysis of real-world data | Secondary data analysis                     | % false positive rate for meal detection                                |
| Zhang et al                                                         | Glycemic pattern identification                 | Heirarchical task abstraction<br>Rule-based heuristics    | Retrospective analysis of real-world data | Qualitative proof-of-concept                | Physician feedback                                                      |
| Charpentier et al                                                   | Insulin dose adjustment                         | Clinical diabetes educator                                | Real-world use                            | Clinical trial                              | % HbA1c                                                                 |
| Cameron et al<br>Calhoun et al<br>Buckingham et al<br>Biester et al | Basal insulin suspension                        | Kalman-filter state estimation                            | Real-world use                            | Clinical study                              | % HbA1c<br>% time-in-hypoglycemia                                       |
| Sparacino et al                                                     | Glucose forecasting and hypoglycemia prediction | Data-driven ARX                                           | Retrospective analysis of simulated data  | <i>In silico</i> clinical study: UVA-Padova | RMSE of forecasted glucose                                              |
| Perez Gandia et al                                                  | Glucose forecasting and hypoglycemia prediction | Artificial neural network                                 | Retrospective analysis of real-world data | Secondary data analysis                     | RMSE of forecasted glucose                                              |
| Zecchin et al                                                       | Glucose forecasting and hypoglycemia prediction | Artificial neural network                                 | Simulated use                             | <i>In silico</i> clinical study: UVA-Padova | % Time in hypoglycemi                                                   |
| Daskalaki et al                                                     | Glucose forecasting and hypoglycemia prediction | Data-driven cARX<br>Recurrent neural network              | Retrospective analysis of real-world data | Secondary data analysis                     | RMSE of forecasted glucose<br>% Sensitivity for hypoglycemia prediction |
| Contrares et al                                                     | Glucose forecasting                             | Clustered grammatical evolution<br>Reinforcement learning | Retrospective analysis of simulated data  | <i>In silico</i> clinical study: UVA-Padova | RMSE of forecasted glucose                                              |

|                              |                                                                  |                                                        |                                                            |                                                                   |                                                                                     |
|------------------------------|------------------------------------------------------------------|--------------------------------------------------------|------------------------------------------------------------|-------------------------------------------------------------------|-------------------------------------------------------------------------------------|
| Montaser et al               | Postprandial hypoglycemia prediction                             | Data-driven ARIMAX                                     | Retrospective analysis of real-world data                  | Secondary data analysis                                           | RMSE of forecasted glucose                                                          |
| Toffanin et al               | Postprandial hypoglycemia prediction                             | Data-driven state-space                                | Retrospective analysis of real-world data                  | Secondary data analysis                                           | FIT and Coefficient of determination of forecasted glucose                          |
| Oveido et al<br>Oveido et al | Postprandial hypoglycemia prediction<br>Insulin bolus adjustment | Support vector regression                              | Retrospective analysis of real-world data<br>Simulated use | <i>In silico</i> clinical study: UVA-Padova                       | % Sensitivity for hypoglycemia prediction<br>% time-in-hypoglycemia following meals |
| Cappon et al                 | Postprandial hypoglycemia prediction<br>Insulin bolus adjustment | Xtreme gradient-boosted tree                           | Simulated use                                              | <i>In silico</i> clinical study: UVA-Padova                       | AUROC<br>% time in range<br>% time in hypoglycemia                                  |
| Schiffrin et al              | Nocturnal hypoglycemia prevention,<br>Carbohydrate intake        | Linear regression<br>Decision theory                   | Real-world use                                             | Clinical study                                                    | Incidence of hypoglycemia<br>% HbA1c                                                |
| Mosquera-Lopez et al         | Nocturnal hypoglycemia prediction and prevention                 | Support vector regression<br>Decision theory           | Retrospective analysis of real-world data<br>Simulated use | Secondary data analysis <i>In silico</i> clinical study: OHSU T1D | % Sensitivity and % Specificity of predicted nocturnal hypoglycemia                 |
| Guemes et al                 | Nocturnal hypoglycemia prediction                                | Support vector regression                              | Retrospective analysis of real-world data                  | Secondary data analysis                                           | % Sensitivity and % Specificity of predicted nocturnal hypoglycemia                 |
| Vehi et al                   | Nocturnal hypoglycemia prediction                                | Support vector regression<br>Artificial neural network | Retrospective analysis of real-world and simulated data    | Secondary data analysis                                           | % Sensitivity and % Specificity of predicted nocturnal hypoglycemia                 |
| Bertachi et al               | Nocturnal hypoglycemia prediction                                | Support vector regression,                             | Retrospective analysis of real-world data                  | Secondary data analysis                                           | % Sensitivity and % Specificity of predicted nocturnal hypoglycemia                 |

|                                |                                                                                            |                                                                    |                                              |                                                |                                                                          |
|--------------------------------|--------------------------------------------------------------------------------------------|--------------------------------------------------------------------|----------------------------------------------|------------------------------------------------|--------------------------------------------------------------------------|
|                                |                                                                                            | Multilayer<br>perceptron neural<br>network                         |                                              |                                                |                                                                          |
| Fabris et al                   | Exercise hypoglycemia<br>prevention, insulin<br>bolus adjustment                           | Model-based activity<br>on board adjustment                        | Simulated use                                | <i>In silico</i> clinical<br>study: UVA-Padova | % time in range<br>% time in hypoglycemia                                |
| Fabris et al                   | Exercise hypoglycemia<br>prevention, insulin<br>bolus adjustment                           | Kalman-filter state<br>estimation                                  | Real-world use                               | Clinical study                                 | % time in range<br>% time in hypoglycemia                                |
| Ramkissoon et al               | Exercise hypoglycemia<br>prevention,<br>insulin dose<br>adjustment,<br>carbohydrate intake | Kalman-filter state<br>estimation                                  | Simulated use                                | <i>In silico</i> clinical<br>study: UVA-Padova | % time in range<br>% time in hypoglycemia                                |
| Beneyto et al                  | Exercise hypoglycemia<br>prevention,<br>carbohydrate intake                                | Proportional<br>derivative controller                              | Simulated use                                | <i>In silico</i> clinical<br>study: UVA-Padova | % time in range<br>% time in hypoglycemia                                |
| Garcia-Tirado et<br>al         | Exercise hypoglycemia<br>prevention                                                        | Model-based<br>characterization of<br>exercise                     | Simulated use                                | <i>In silico</i> clinical<br>study: UVA-Padova | % time in range<br>% time in hypoglycemia                                |
| Ben Brahim et al               | Exercise-related glucose<br>forecasting                                                    | Linear regression                                                  | Retrospective analysis<br>of real-world data | Secondary data<br>analysis                     | Pearson's correlation,<br>Predictive features                            |
| Hayeri                         | Exercise-related glucose<br>forecasting                                                    | Gradient boosted<br>decision trees<br>Support vector<br>regression | Retrospective analysis<br>of real-world data | Secondary data<br>analysis                     | Clarke error grid                                                        |
| Reddy et al                    | Exercise hypoglycemia<br>prediction                                                        | Random forest<br>decision tree                                     | Retrospective analysis<br>of real-world data | Secondary data<br>analysis                     | % Sensitivity and %<br>Specificity of predicted<br>exercise hypoglycemia |
| Hajizadeh et al<br>Hobbs et al | Exercise-related glucose<br>forecasting                                                    | Data-driven ARX                                                    | Retrospective analysis<br>of real-world data | Secondary data<br>analysis                     | RMSE of forecasted<br>glucose                                            |
| Romero-Ugalde<br>et al         | Exercise-related glucose<br>forecasting                                                    | Data-driven ARX                                                    | Retrospective analysis<br>of real-world data | Secondary data<br>analysis                     | RMSE of forecasted<br>glucose                                            |

|             |                                                   |                                   |                                           |                                            |                                        |
|-------------|---------------------------------------------------|-----------------------------------|-------------------------------------------|--------------------------------------------|----------------------------------------|
| Eissa et al | Adjustment of time-blocks used for insulin dosing | K-means clustering                | Retrospective analysis of real-world data | Data-collection<br>Secondary data analysis | Agreement with specialists             |
| Avila et al | Adjustment of glycemic target                     | Decision tree, Recommender system | Retrospective analysis of simulated data  | Secondary data analysis                    | RMSE of predicted glycemic variability |
